# Supplementary material for: Knockdown of NEAT1 restrained the malignant progression of glioma stem cells by activating microRNA let-7e
Source: PubMed Central journal article supplement (PMC5308721; doi:10.18632/oncotarget.11403), 2016-08-19
Supplement: oncotarget-07-62208-s001.pdf [file oncotarget-07-62208-s001.pdf]

## Knockdown of *NEAT1* restrained the malignant progression of glioma stem cells by activating microRNA *let-7e*

### SUPPLEMENTARY FIGURE

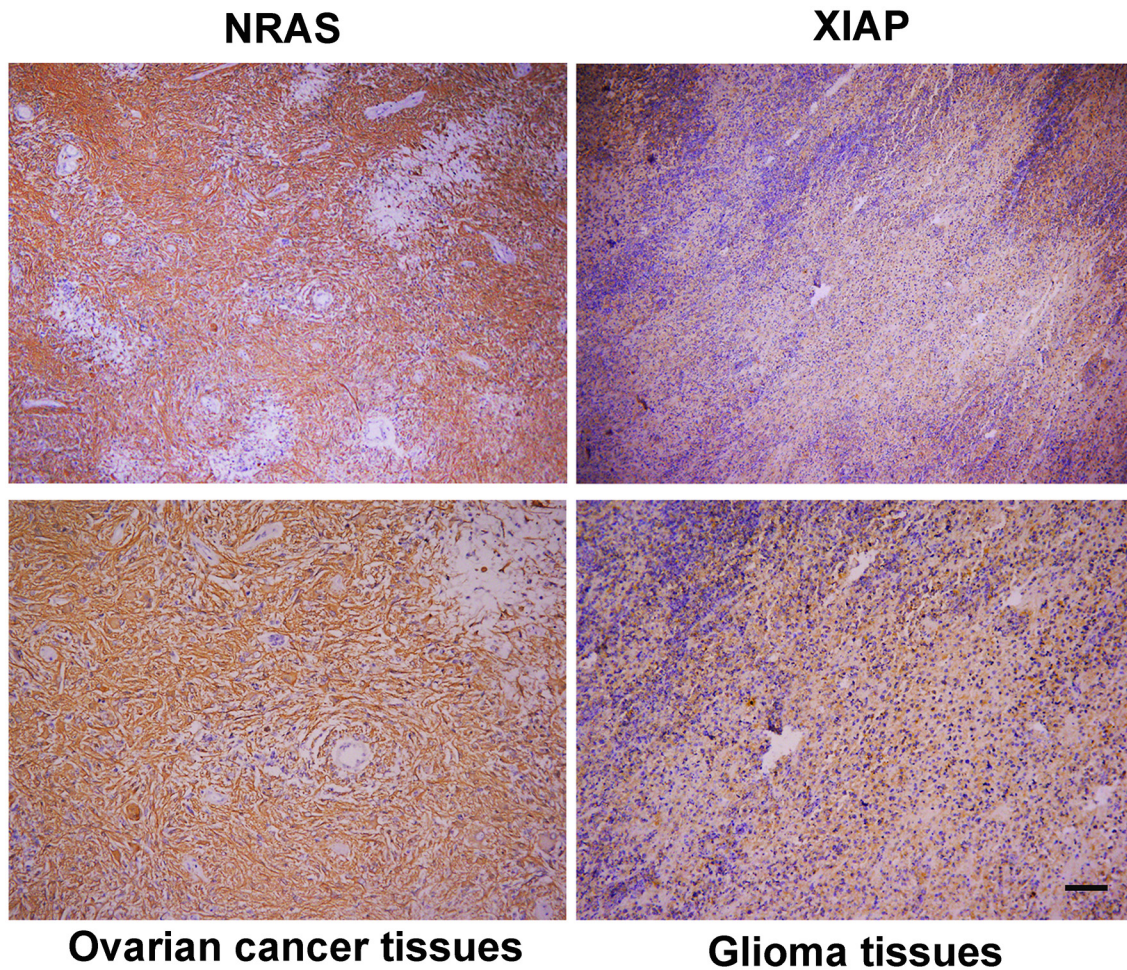

**Supplementary Figure S1: Positive control tissue and a control primary antibody for Figure 5A.** Left: Immunohistochemistry of *NRAS* protein in ovarian cancer tissue. Right: Immunohistochemistry of *XIAP* protein in glioma tissue. Scale bar, 50  $\mu$ m.
